# Supplementary material for: Ex Vivo COL7A1 Correction for Recessive Dystrophic Epidermolysis Bullosa Using CRISPR/Cas9 and Homology-Directed Repair
Source: PubMed Central journal article supplement (PMC6077132; doi:10.1016/j.omtn.2018.06.008), 2018-06-26
Supplement: mmc1.pdf [file mmc1.pdf]

OMTN, Volume 12

## Supplemental Information

### ***Ex Vivo COL7A1* Correction for Recessive Dystrophic Epidermolysis Bullosa Using CRISPR/Cas9 and Homology-Directed Repair**

Araksya Izmiryan, Clarisse Ganier, Matteo Bovolenta, Alain Schmitt, Fulvio Mavilio, and Alain Hovnanian

**Figure S1**

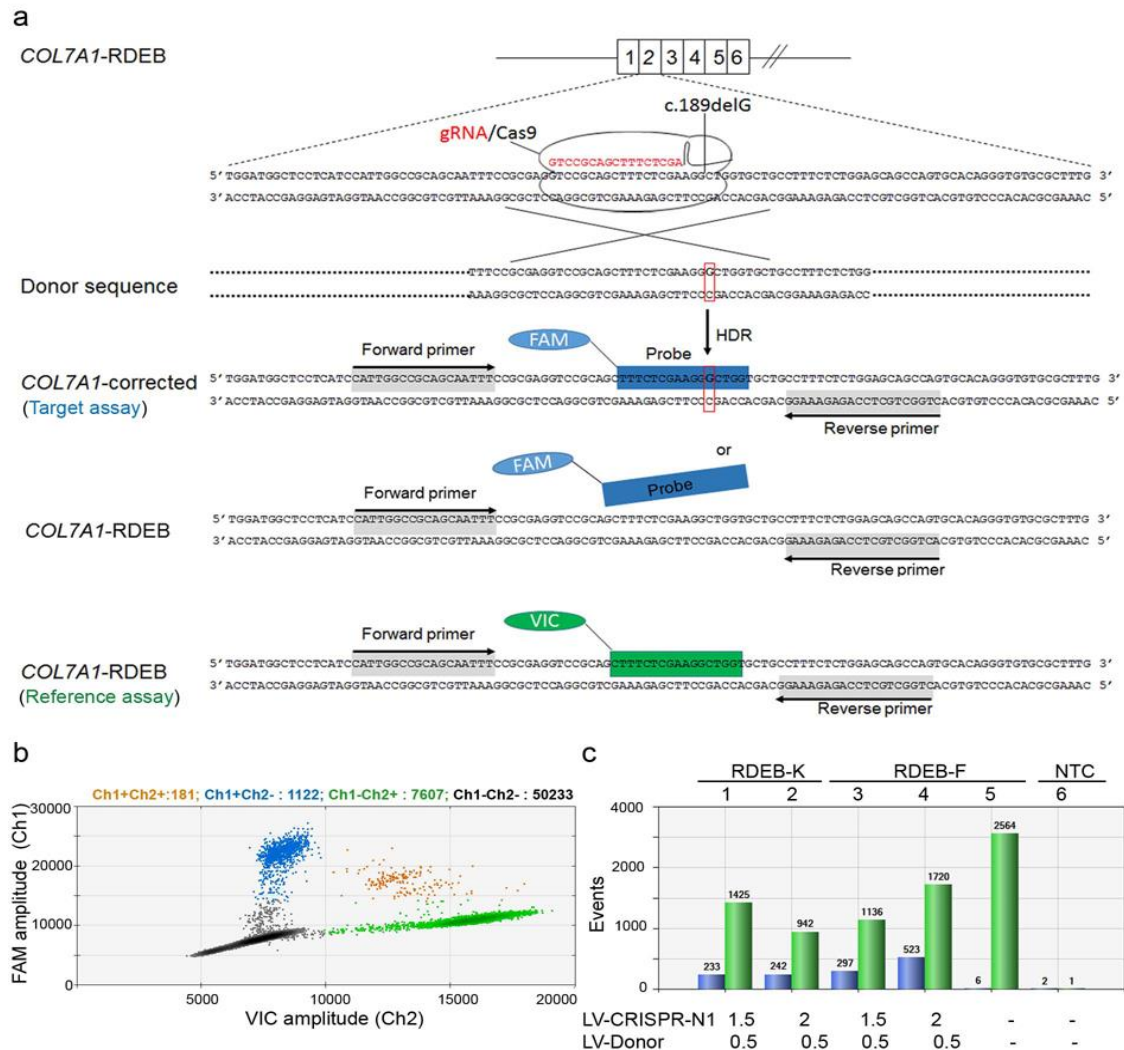

**Detection of CRISPR/Cas9-mediated HDR at the *COL7A1* locus by Taqman-ddPCR on the genomic DNA level.** (a) Gene editing detection strategy for *COL7A1* by ddPCR. Location of a common primer pair and allele-specific probes conjugated with FAM (specific for the corrected *COL7A1*) or VIC (specific for the mutated *COL7A1*) fluorophores are indicated. (b) 2-D fluorescence amplitude plot generated by Quantasoft software showing walls containing both of corrected and mutant *COL7A1*. The black cluster on the plot represents the negative droplets (Ch1-Ch2-), the blue cluster represent the droplets that are positive for the corrected *COL7A1* only (Ch1+Ch2-), the green cluster represents the droplets that are positive for the mutant *COL7A1* only (Ch1-Ch2+) and the orange cluster represents the droplets that are positive for both (Ch1+Ch2+). (c) The ‘Events’ histogram shows the total number of droplets positive for FAM (in blue) and VIC (in green) signals which correspond to the corrected or mutated *COL7A1*, respectively. Ch1: channel 1, corresponds to the FAM amplitude; Ch2: channel 2, corresponds to the VIC amplitude.

**Figure S2**

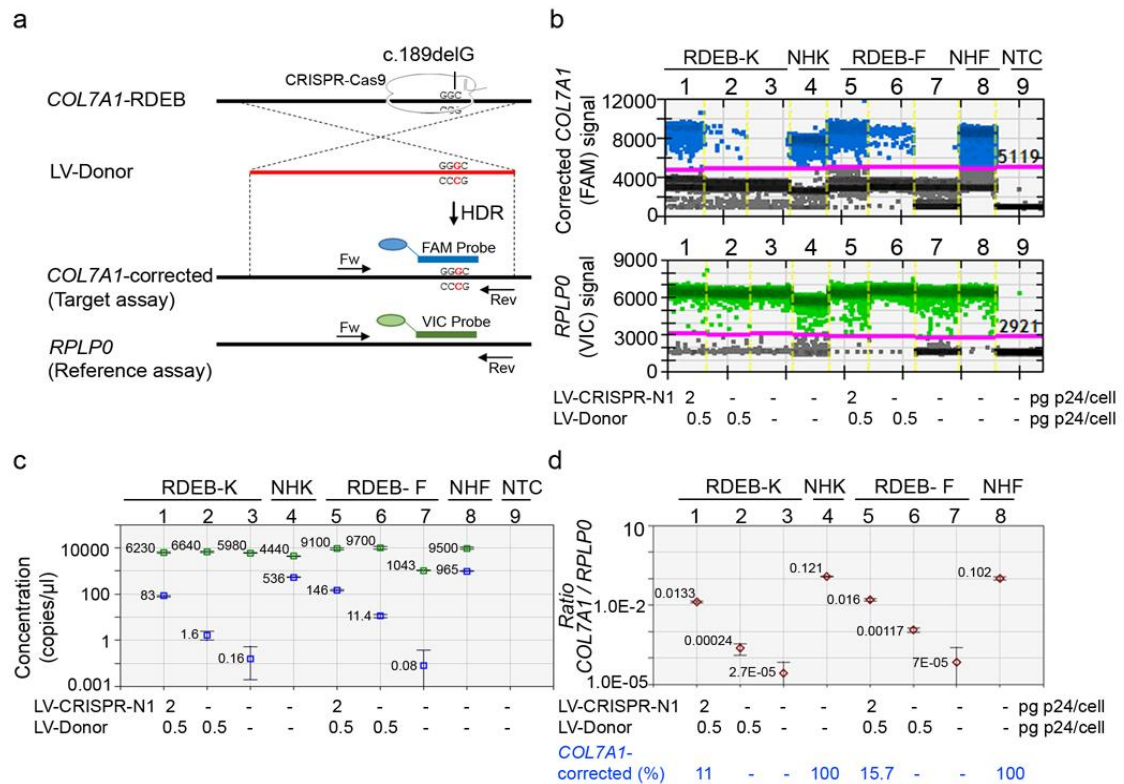

**TaqMan-ddPCR-based detection of corrected *COL7A1* mRNA expression after CRISPR/Cas9-mediated HDR.** (a) Gene editing detection strategy for *COL7A1* by ddPCR at the mRNA level. In the scheme, the same experimental settings as for the Figure 3a, are shown. The VIC-conjugated specific probe recognizes the housekeeping gene *RPLP0*. (b) Primary RDEB-K and RDEB-F were transduced with indicated doses of IDLVs ( $\mu\text{g}$  p24 per cell). 21-days post transduction, mRNA was extracted, subjected for Reverse Transcription and analyzed by Taqman-ddPCR to detect the expression of corrected *COL7A1* relative to the expression level of *COL7A1* in normal cells. 1-D fluorescence amplitude plots are shown. Yellow lines indicate borders between different samples. Blue dots correspond to the FAM signal and represent droplets containing the corrected *COL7A1*. Green dots correspond to the VIC signal and represent housekeeping *RPLP0*. Grey dots correspond to empty droplets. (c-d) Quantification of positive droplets using QuantaSoft. The concentration plot, showing gene-edited wells of FAM and VIC amplicons is automatically determined by the software using the total number of events (displayed in Figure S2) by correcting for Poisson distribution. The blue markers indicate corrected *COL7A1* copies/ $\mu\text{l}$  and the green markers indicate housekeeping *RPLP0* copies/ $\mu\text{l}$ . The 'Ratio' plot shows the percentage of the corrected *COL7A1* normalized to the housekeeping *RPLP0* background (orange markers). All error bars were generated by QuantaSoft and represent a 95% confidence interval. The percentage of corrected *COL7A1* mRNA in RDEB-K and RDEB-F was calculated by considering the Ratio of *COL7A1/RPLP0* in normal cells (NHK and NHF, respectively) as 100%.

**Figure S3**

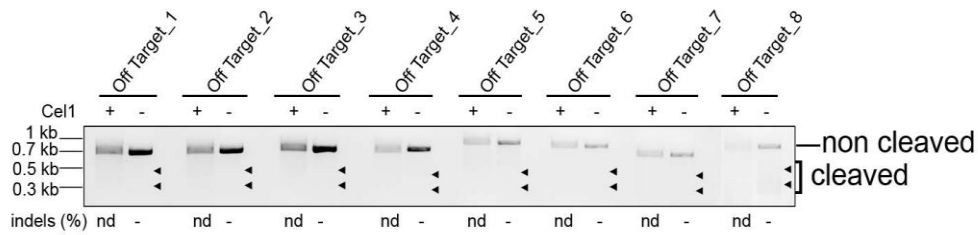

**Off-target site analysis in genetically corrected RDEB-K 21 days post-transduction.**

Genomic DNA from corrected RDEB-K co-treated with IDLVs encoding for the LV-CRISPR-N1 (2 pg p24 per cell) and the LV-Donor (0.5 pg p24 per cell) was extracted and regions corresponding to off-target sequences were amplified by PCR using specific primers (listed in Table S4). The Surveyor cleavage assay was performed at each potential off-target hit. No Surveyor activity indicative of cleavage at predicted off-target sites was detected. nd: non detected.

**Figure S4**

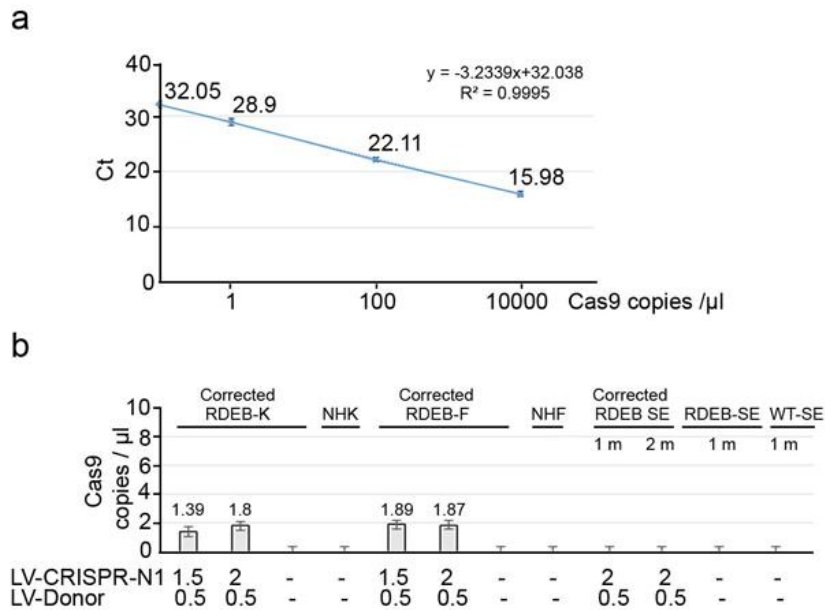

**Absolute quantification the residual Cas9 transcripts in genetically corrected cells and grafted skin equivalents.** (a) Standard curve of the lentiCRISPR\_v2 plasmid DNA, ranging from 1 to 10<sup>9</sup> copies/μl. The Ct values were plotted against the logarithm of their initial template copy numbers. The standard curve was generated by linear regression of the plotted points. (b) To evaluate the persistence of Cas9 cDNA in cells after IDLV transduction, total mRNA was extracted and cDNA was synthesized from bulk transduced RDEB-K, RDEB-F and from grafted skin equivalents. Cas9 expression in transduced cells and in grafted skin equivalents was evaluated in triplicates. Three independent experiments were performed.



**Figure S5**

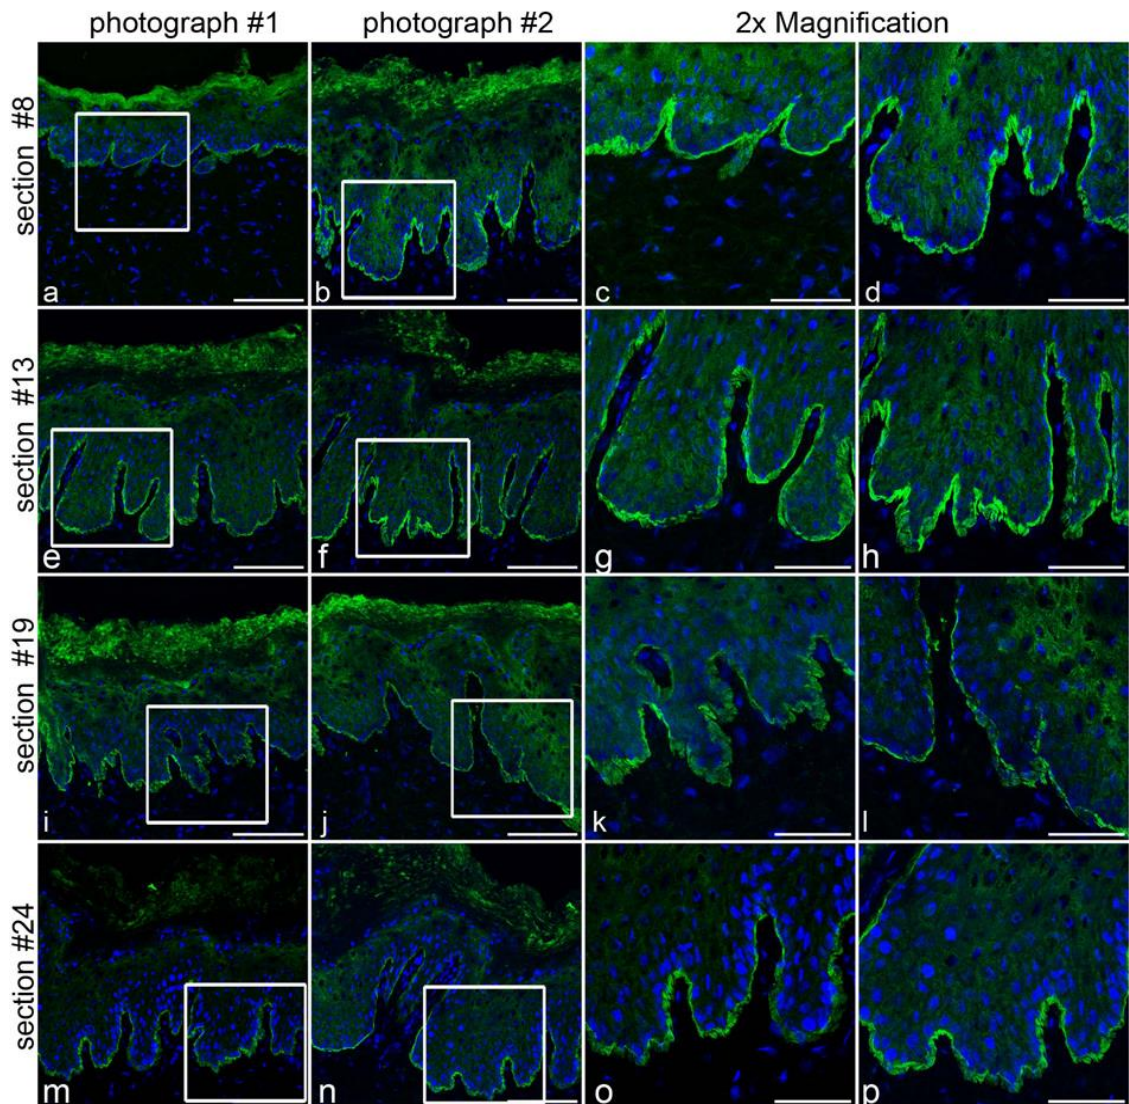

**Type VII collagen rescue, localization and AF formation at the dermal-epidermal junction in serial sections of the genetically corrected skin grafts.** Immunofluorescence analysis of grafted SE composed of genetically corrected primary RDEB keratinocytes and fibroblasts at 2 months after deflaping. Skin samples composed of genetically corrected cells showed re-expression and normal localization of C7 at the dermal-epidermal junction in serial sections of SE. Scale bar = 100  $\mu$ m.

Figure S6

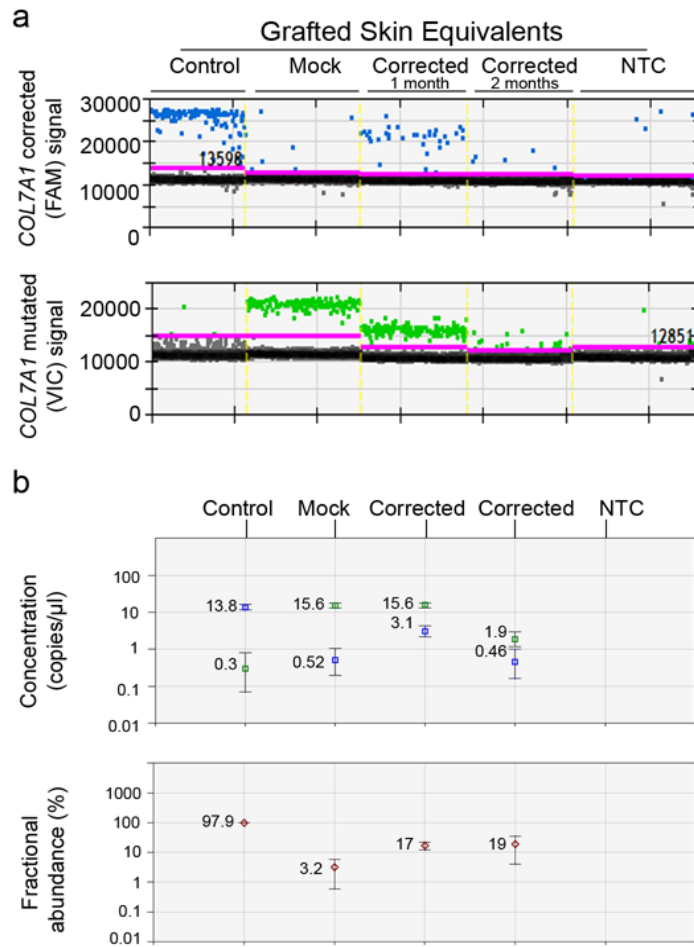

**Detection of CRISPR/Cas9-mediated HDR at the *COL7A1* locus by Taqman-ddPCR on the genomic DNA level in skin grafts.** See Figure S1 for the experimental settings. (a) 1 month or 2 months post-grafting, gDNA was extracted from cryosections and analyzed by ddPCR to assess allelic frequency of corrected *COL7A1* on the mutated background in skin grafts. 1-D fluorescence amplitude plots are shown for FAM and VIC signals. Blue dots correspond to the FAM signal amplitude and represent droplets containing the normal or corrected *COL7A1* alleles. Green dots correspond to the VIC signal amplitude and represent the mutated *COL7A1* alleles. Grey dots correspond to empty droplets. Yellow lines indicate borders between different samples. (b) Quantification of positive droplets using QuantaSoft Software. The concentration plot, showing gene-edited wells of FAM and VIC amplicons is automatically determined by the software using the total number of events by correcting for Poisson distribution. The blue markers indicate corrected *COL7A1* copies/ $\mu$ l and the green markers indicate mutated *COL7A1* copies/ $\mu$ l. The Fractional abundance plot shows the percentage frequency of the corrected *COL7A1* on the mutated *COL7A1* background. All error bars were generated by QuantaSoft and represent a 95% confidence interval.

**Table S1. Sequences of guide RNAs**

| <b>gRNA</b> | <b>Sequence</b>   | <b>gRNA length (bp)</b> | <b>Strand</b>  | <b>Cut-to-mutation distance* (bp)</b> | <b>Off target activity</b>           | <b>Surveyor digestion product (bp)</b>              |
|-------------|-------------------|-------------------------|----------------|---------------------------------------|--------------------------------------|-----------------------------------------------------|
| N1          | GTCCGCAGCTTTCTCGA | 17                      | First Strand   | 5 (downstream)                        | 0 MMs = 1<br>1 MMs = 0<br>2 MMs = 3  | 684 (non cleaved)<br>379 (cleaved)<br>305 (cleaved) |
| N2          | GAAAGCTGCGGACCTCG | 17                      | Reverse Strand | 21 (downstream)                       | 0 MMs = 1<br>1 MMs = 0<br>2 MMs = 6  | 684 (non cleaved)<br>391 (cleaved)<br>293 (cleaved) |
| N3          | GATGGCTCCTCATCCAT | 17                      | First Strand   | 43 (downstream)                       | 0 MMs = 1<br>1 MMs = 0<br>2 MMs = 18 | 684 (non cleaved)<br>340 (cleaved)<br>344 (cleaved) |
| N4          | GCGCACACCCTGTGCAC | 17                      | Reverse Strand | 31 (upstream)                         | 0 MMs = 1<br>1 MMs = 0<br>2 MMs = 14 | 684 (non cleaved)<br>444 (cleaved)<br>240 (cleaved) |
| N5          | GCTGCGGCCAATGGATG | 17                      | Reverse Strand | 44 (downstream)                       | 0 MMs = 1<br>1 MMs = 1<br>2 MMs = 14 | 684 (non cleaved)<br>366 (cleaved)<br>318 (cleaved) |

**Table S2. Absolute quantification of residual Cas9 cDNA expression in genetically corrected RDEB keratinocytes, fibroblasts and in grafted skin equivalents (SE)**

|                            |             | Experience N1 | Experience N2 | Experience N3 | Mean Experiences N1-N2-N3 |                      |
|----------------------------|-------------|---------------|---------------|---------------|---------------------------|----------------------|
| Sample Name                | Target gene | Mean Ct       | Mean Ct       | Mean Ct       | Mean Ct                   | Cas9 copies/ $\mu$ l |
| RDEB-K (IDLVs : 1.5 / 0.5) | Cas9        | 27.4          | 27.76         | 27.42         | 27.52                     | 1.39                 |
| RDEB-K (IDLVs : 2 / 0.5)   | Cas9        | 26.07         | 26.97         | 25.54         | 26.19                     | 1.8                  |
| RDEB-K                     | Cas9        | 32.52         | 32.98         | 32.01         | 32.5                      | -                    |
| NHK                        | Cas9        | 35.9          | 34.05         | 34.04         | 34.66                     | -                    |
| RDEB-F (IDLVs : 1.5 / 0.5) | Cas9        | 25.63         | 26.22         | 25.91         | 25.92                     | 1.89                 |
| RDEB-F (IDLVs : 2 / 0.5)   | Cas9        | 26.07         | 26.09         | 25.73         | 25.96                     | 1.87                 |
| RDEB-F                     | Cas9        | Undetermined  | Undetermined  | Undetermined  | Undetermined              | -                    |
| NHF                        | Cas9        | Undetermined  | Undetermined  | Undetermined  | Undetermined              | -                    |
| Corrected-SE-1 month - N1  | Cas9        | 32.33         | Undetermined  | Undetermined  | 32.33                     | -                    |
| Corrected-SE-1 month - N2  | Cas9        | Undetermined  | Undetermined  | Undetermined  | Undetermined              | -                    |
| Corrected-SE-1 month - N3  | Cas9        | Undetermined  | Undetermined  | Undetermined  | Undetermined              | -                    |
| Corrected-SE-2 months - N1 | Cas9        | 39.34         | Undetermined  | Undetermined  | 39.34                     | -                    |
| Corrected-SE-2 months - N2 | Cas9        | 36.94         | 33.18         | Undetermined  | 35.06                     | -                    |
| Corrected-SE-2 months - N3 | Cas9        | Undetermined  | Undetermined  | 31.4          | 31.4                      | -                    |
| RDEB-SE-1 month - N1       | Cas9        | Undetermined  | 37.27         | Undetermined  | 37.27                     | -                    |
| RDEB-SE-1 month - N2       | Cas9        | Undetermined  | 30.88         | 34.83         | 32.85                     | -                    |
| WT-SE-1 month - N1         | Cas9        | 39.44         | Undetermined  | Undetermined  | 39.44                     | -                    |
| WT-SE-1 month - N2         | Cas9        | Undetermined  | Undetermined  | Undetermined  | Undetermined              | -                    |

**Table S3. HDR efficiency in genetically corrected RDEB cells and grafted skin equivalents (SE)**

| Cells/Grafts | Genetically corrected RDEB-K |       |         | Genetically corrected RDEB-F |       |         | Grafted SE |         |
|--------------|------------------------------|-------|---------|------------------------------|-------|---------|------------|---------|
| Sample       | gDNA                         | cDNA  | Protein | gDNA                         | cDNA  | Protein | gDNA       | Protein |
| Assay        | ddPCR                        | ddPCR | WB      | ddPCR                        | ddPCR | WB      | ddPCR      | IF      |
| Figure       | N3                           | S2    | N5      | N3                           | S2    | N5      | N6, S6     | N6, S6  |
| Correction   | 19.6%                        | 11%   | 11%     | 22.1%                        | 15.7% | -       | 17-19%     | 20-26%  |



**Table S4. Oligonucleotides and Probes sequences**

| Figure       | Assay               | Primer name  | Sequence                    |
|--------------|---------------------|--------------|-----------------------------|
| N1           | NHEJ activity       | Fw_Surveyor  | GTCCCCTGCCTTATGCCAA         |
| N1           | NHEJ activity       | Rev_Surveyor | GCACCTTCCTGTCTTGCAGT        |
| N2           | Allele specific PCR | Commun_P1    | GATTCCTCCTAATTCTGGGACTC     |
| N2           | Allele specific PCR | Mutant_P2    | GCACCTTCCTGTCTTGCAGTAG      |
| N2           | Allele specific PCR | Corrected_P3 | GCACCTTCCTGTCAGCAAGTGA      |
| N2           | Allele specific PCR | Fw_GAPDH     | TCCATGCCAT CACTGCCACCCAG    |
| N2           | Allele specific PCR | Rev_GAPDH    | CATACCAGGAAATGAGCTTGACAAAGT |
| N3; S1, 2, 5 | TaqMan-ddPCR        | Fw_Exon2     | CATTGGCCGCAGCAATTT          |
| N3; S1, 2, 5 | TaqMan-ddPCR        | Rev_Exon2    | CTGGCTGCTCCAGAGAAAGG        |
| N3; S1, 2, 5 | TaqMan-ddPCR        | FAM_Probe    | TTTCTCGAAGGGCTG-MGB         |
| N3; S1, 5    | TaqMan-ddPCR        | VIC_Probe    | CTTTCTCGAAGGCTGGT-MGB       |
| N6, S3       | Off-target activity | Fw_OT1       | GCTGCCTTCTCGTACTACA         |
| N6, S3       | Off-target activity | Rev_OT1      | TGCCTTTCATAGGGAGTGCTG       |
| N6, S3       | Off-target activity | Fw_OT2       | AATTCTGCTTGTGGCTGCAC        |
| N6, S3       | Off-target activity | Rev_OT2      | ACCACGATTGGACTAGAAGGC       |
| N6, S3       | Off-target activity | Fw_OT3       | AGGTTACAGAGGCTGTAACG        |
| N6, S3       | Off-target activity | Rev_OT3      | TCTGCTAGACACCCCTCTC         |
| N6, S3       | Off-target activity | Fw_OT4       | GTCGCTTTGCTTGTCTCTG         |
| N6, S3       | Off-target activity | Rev_OT4      | ACTTCAGCAACTGGAGAGGC        |
| N6, S3       | Off-target activity | Fw_OT5       | GATAAGAAATGAGGTAATGC        |
| N6, S3       | Off-target activity | Rev_OT5      | CACAGCAAGAATACATCATCTA      |
| N6, S3       | Off-target activity | Fw_OT6       | CCAGGGCAAGGGTCTTTCTC        |
| N6, S3       | Off-target activity | Rev_OT6      | TTTGCTGGGCTACTTTGCAG        |
| N6, S3       | Off-target activity | Fw_OT7       | TCCCAAGTTAGGAGGGGTCA        |
| N6, S3       | Off-target activity | Rev_OT7      | CCAGAAATGGAGTGGGCTGT        |
| N6, S3       | Off-target activity | Fw_OT8       | GGGACACATGTGCAGACTCA        |
| N6, S3       | Off-target activity | Rev_OT8      | GAGCCATCTGCAGGGTTTGT        |
| S4           | Absolute qPCR       | Fw_Cas9      | GGACTCCCGATGAACACTAAG       |
| S4           | Absolute qPCR       | Rev_Cas9     | AAAGTGCGCGAGATCAACAAC       |
